# Supplementary material for: Multimodal effects of an extracellular matrix on cellular morphology, dynamics and functionality
Source: Royal Society of Chemistry journal article supplement (doi:10.1039/d4tb00360h), 2024-01-01
Supplement: d4tb00360h1.pdf [file d4tb00360h1.pdf]

**Supplementary Information for**

**The Multimodal Effects of Extracellular Matrix on Cellular  
Morphology, Dynamics and Functionality**

Xin Chen, Wenhao Liu, Chi Su, Jianyang Shan, Xiang Li, Yimin Chai, Yaling Yu,  
Gen Wen

**Supplementary files**

Figs. 1-4

Table S1-S2

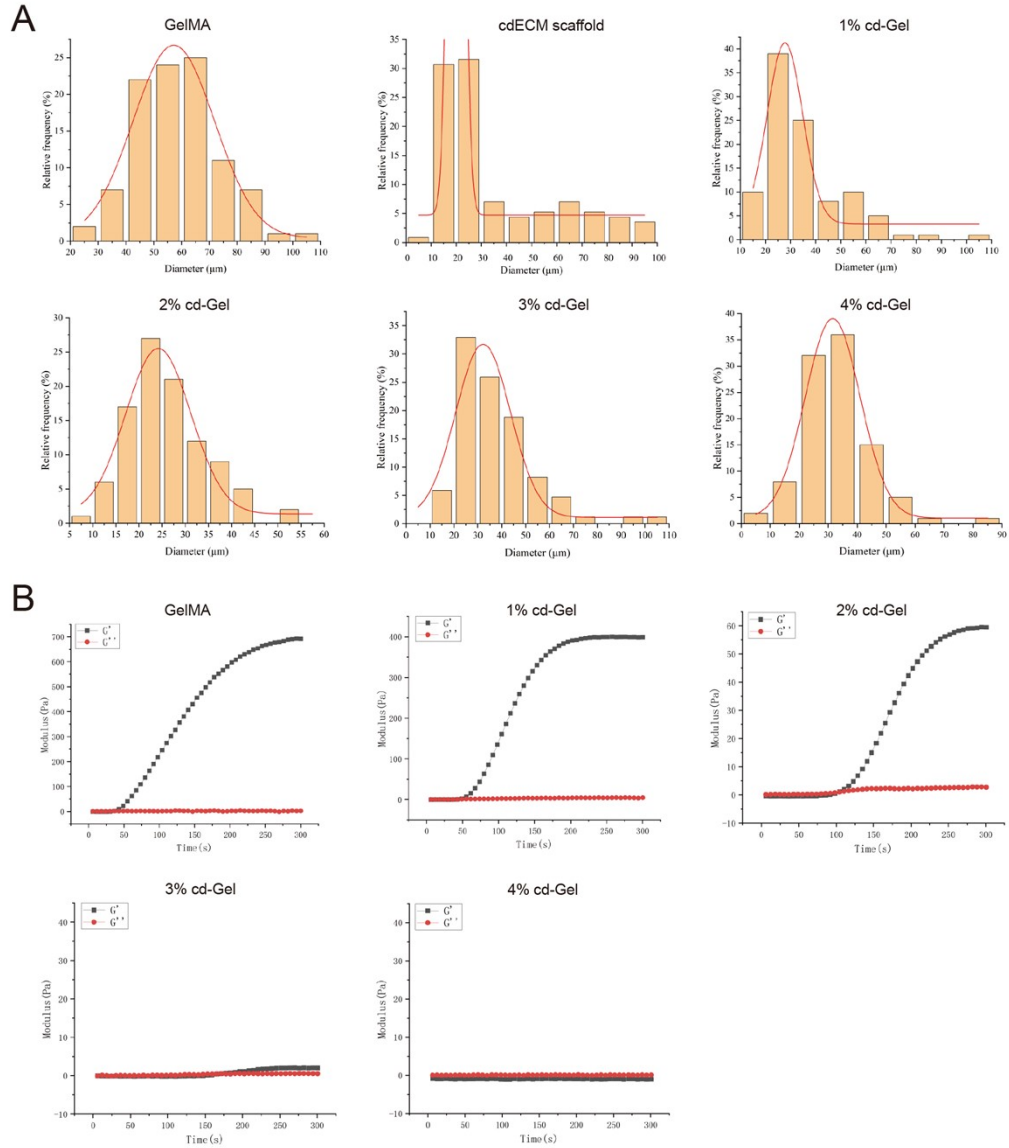

**Figs. 1. Characterization of GelMA hydrogel, cd-Gel hybrid and cdECM scaffold. (A)** Distribution of pore size in GelMA hydrogel, cd-Gel hybrid and cdECM scaffold. **(B)** Rheological properties of GelMA hydrogel and cd-Gel hybrid.

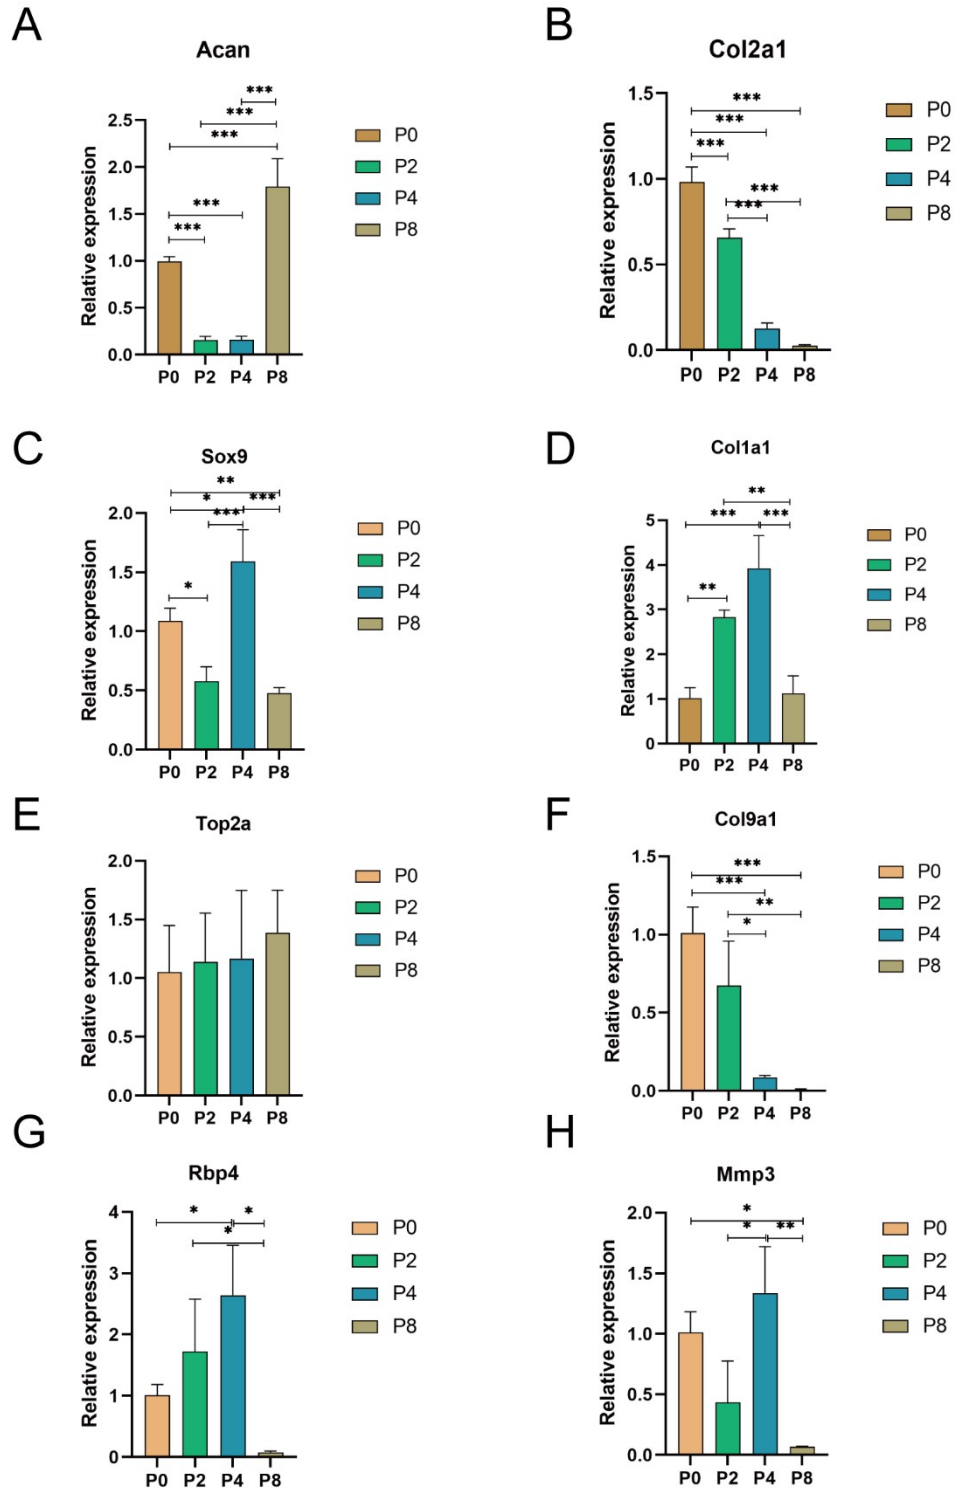

**Figs. 2. QPCR analysis of chondrocyte phenotype related genes in GelMA hydrogel, cd-Gel hybrid hydrogel and cdECM scaffold. \* $p < 0.05$ , \*\* $p < 0.01$ , and \*\*\* $p < 0.001$ .**

**A**

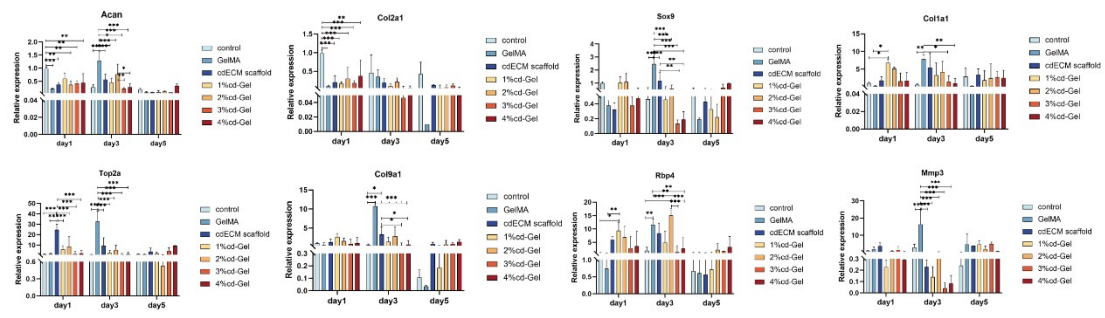

**B**

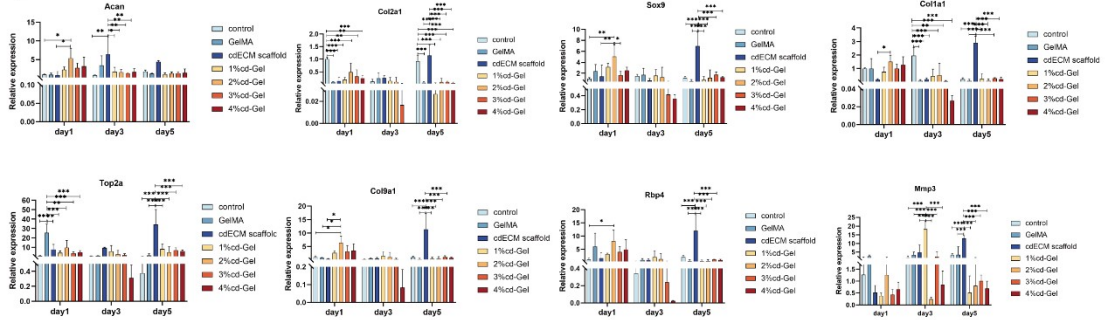

**Figs. 3. QPCR analysis of chondrocyte phenotype related genes in GelMA hydrogel, cd-Gel hybrid hydrogel and cdECM scaffold at different times. (A) Analysis of P0 chondrocytes at day 1, 3, 5. (B) Analysis of P2 chondrocytes at day 1, 3, 5. \* $p < 0.05$ , \*\* $p < 0.01$ , and \*\*\* $p < 0.001$ .**

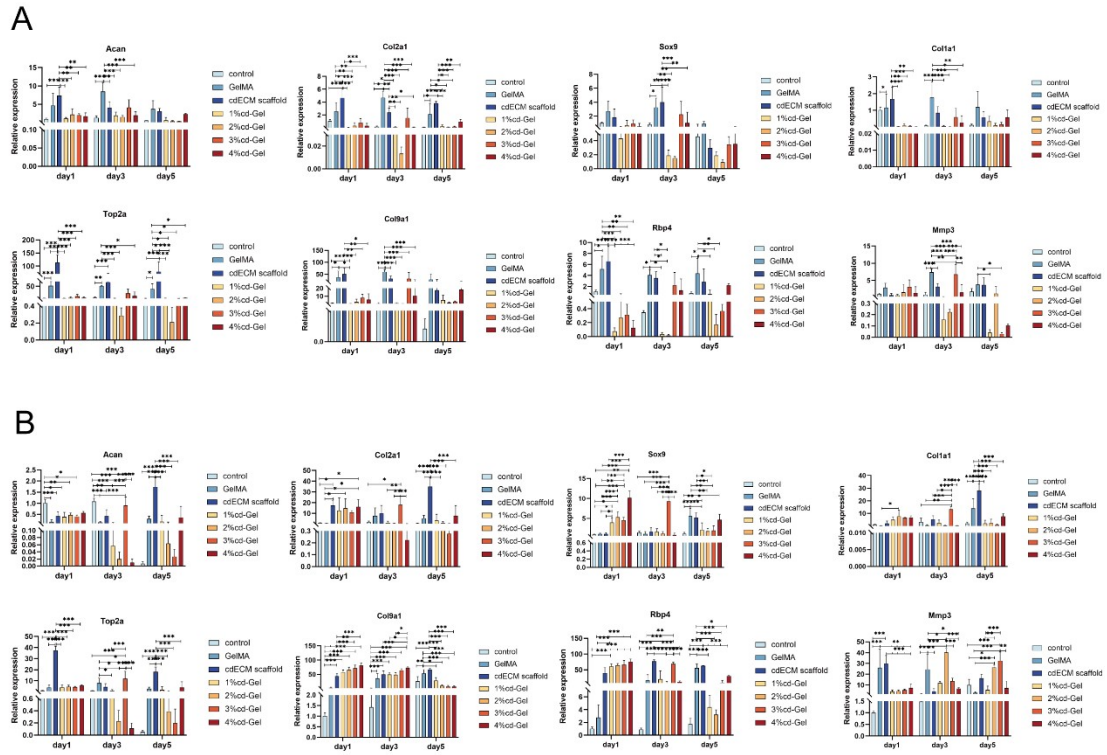

**Figs. 4. QPCR analysis of chondrocyte phenotype related genes in GelMA hydrogel, cd-Gel hybrid hydrogel and cdECM scaffold at different times. (A) Analysis of P4 chondrocytes at day 1, 3, 5. (B) Analysis of P8 chondrocytes at day 1, 3, 5. \* $p < 0.05$ , \*\* $p < 0.01$ , and \*\*\* $p < 0.001$ .**

Table S1. List of sequence of primers applied in RT-PCR experiments

| Genes  | Sequence of primer                                              |
|--------|-----------------------------------------------------------------|
| GAPDH  | F 5'-AAACCCATCACCATCTTCCAG-3'<br>R 5'-CTCCACGACATACTCAGCACC-3'  |
| COL2A1 | F 5'-GGTGTCAAGGGTCACAGAGG-3'<br>R 5'-TTGGGGCCTTGTTACCTTT-3'     |
| SOX9   | F 5'-ACTGTATGTGGATGTGTGCGT-3'<br>R 5'-AAG GTCTGTCCGATGTCTCTC-3' |
| ACAN   | F 5'-ATGAGTGGCAGTGGAGATTC-3'<br>R 5'-AGA CCCTAACCCCTTCTTTC-3'   |
| COL1A1 | F 5'-TAGGAGTCGAGGGACCCAAG-3'<br>R 5'-AGGCTCTCCCTTAGGACCAG-3'    |
| TOP2a  | F 5'-GGTGAAAGCGAAGGGGAAGA-3'<br>R 5'-GAGAAGCTGGCACACTGTCT-3'    |
| COL9A1 | F 5'-CGACCCTGGGAAAAGAGGAC-3'<br>R 5'-GGGATTCCGTCTCGACCATC-3'    |
| Rbp4   | F 5'-GGTGAGCAGCTTCAGAGTCA-3'<br>R 5'-TGAGGGTCTGCTTTGACAGT-3'    |
| MMP3   | F 5'-ATCCCTTTTGATGGGCCTGG-3'<br>R 5'-GGATGGAAGAGACGGCCAAA-3'    |

Table S2. Flow cytometry data of ROS level

| Group          | Tube    | Positive ratio |
|----------------|---------|----------------|
| control        | Tube 1  | 97.72%         |
|                | Tube 2  | 99.59%         |
|                | Tube 3  | 99.77%         |
| GelMA          | Tube 4  | 99.88%         |
|                | Tube 5  | 99.92%         |
|                | Tube 6  | 99.78%         |
| cdECM-scaffold | Tube 8  | 44.84%         |
|                | Tube 9  | 32.28%         |
|                | Tube 10 | 48.32%         |
| 1% cd-Gel      | Tube 11 | 22.35%         |
|                | Tube 12 | 21.19%         |
|                | Tube 13 | 10.94%         |
| 2% cd-Gel      | Tube 14 | 22.01%         |
|                | Tube 15 | 10.77%         |
|                | Tube 16 | 9.8%           |
| 3% cd-Gel      | Tube 17 | 12.38%         |
|                | Tube 18 | 12.56%         |
|                | Tube 19 | 17.37%         |
| 4% cd-Gel      | Tube 20 | 11.19%         |
|                | Tube 21 | 13.24%         |
|                | Tube 22 | 28.89%         |
